# Supplementary material
Source: publisher figshare collection journal article supplement (https://acs.figshare.com/ndownloader/files/3803389)
Supplement: Supplementary file 1 [file 3803389]

 
data_cu-745a 
 
_audit_creation_method
;
CrysAlisPro, Agilent Technologies,
Version 1.171.37.31 (release 14-01-2014 CrysAlis171 .NET)
(compiled Jan 14 2014,18:38:05)
;
_chemical_name_systematic 
; 
 ? 
; 
_chemical_name_common             ? 
_chemical_melting_point           ? 
_chemical_formula_moiety          ? 
_chemical_formula_sum 
 'C74 H120 N4 O8 Si4' 
_chemical_formula_weight          1306.10 
 
loop_ 
 _atom_type_symbol 
 _atom_type_description 
 _atom_type_scat_dispersion_real 
 _atom_type_scat_dispersion_imag 
 _atom_type_scat_source 
 'C'  'C'   0.0181   0.0091 
 'International Tables Vol C Tables 4.2.6.8 and 6.1.1.4' 
 'H'  'H'   0.0000   0.0000 
 'International Tables Vol C Tables 4.2.6.8 and 6.1.1.4' 
 'N'  'N'   0.0311   0.0180 
 'International Tables Vol C Tables 4.2.6.8 and 6.1.1.4' 
 'O'  'O'   0.0492   0.0322 
 'International Tables Vol C Tables 4.2.6.8 and 6.1.1.4' 
 'Si'  'Si'   0.2541   0.3302 
 'International Tables Vol C Tables 4.2.6.8 and 6.1.1.4' 
 
_symmetry_cell_setting            monoclinic
_symmetry_space_group_name_H-M    P21/c 
 
loop_ 
 _symmetry_equiv_pos_as_xyz 
 'x, y, z' 
 '-x, y+1/2, -z+1/2' 
 '-x, -y, -z' 
 'x, -y-1/2, z-1/2' 
 
_cell_length_a                    10.7865(2) 
_cell_length_b                    17.7748(4) 
_cell_length_c                    41.4406(9) 
_cell_angle_alpha                 90.00 
_cell_angle_beta                  97.225(2) 
_cell_angle_gamma                 90.00 
_cell_volume                      7882.2(3) 
_cell_formula_units_Z             4 
_cell_measurement_temperature     150(2) 
_cell_measurement_reflns_used     13741
_cell_measurement_theta_min       2.6960
_cell_measurement_theta_max       72.6580
 
_exptl_crystal_description        rod 
_exptl_crystal_colour             colourless 
_exptl_crystal_size_max           0.90 
_exptl_crystal_size_mid           0.26 
_exptl_crystal_size_min           0.20 
_exptl_crystal_density_meas       ? 
_exptl_crystal_density_diffrn     1.101 
_exptl_crystal_density_method     'not measured' 
_exptl_crystal_F_000              2848 
_exptl_absorpt_coefficient_mu     1.103 
_exptl_absorpt_correction_type    'multi-scan'
_exptl_absorpt_correction_T_min   0.4368 
_exptl_absorpt_correction_T_max   0.8095 
_exptl_absorpt_process_details
;
CrysAlisPro, Agilent Technologies,
Version 1.171.37.31 (release 14-01-2014 CrysAlis171 .NET)
(compiled Jan 14 2014,18:38:05)
Empirical absorption correction using spherical harmonics,
 implemented in SCALE3 ABSPACK scaling algorithm.
;
 
_exptl_special_details 
; 
 ? 
; 
 
_diffrn_ambient_temperature       150.00(10) 
_diffrn_ambient_environment       'N~2~'
_diffrn_source                    'sealed X-ray tube'
_diffrn_source_type               'SuperNova (Cu) X-ray Source'
_diffrn_radiation_probe           'x-ray'
_diffrn_radiation_type            'Cu K\a'
_diffrn_radiation_wavelength       1.54184
_diffrn_radiation_monochromator   'mirror'
_diffrn_measurement_device        'four-circle diffractometer'
_diffrn_measurement_device_type   'SuperNova, Single source at offset, Atlas'
_diffrn_detector                  'CCD plate'
_diffrn_detector_type             'Atlas'
_diffrn_measurement_method        '\w scans'
_diffrn_detector_area_resol_mean  10.5435
_diffrn_standards_number          ? 
_diffrn_standards_interval_count  ? 
_diffrn_standards_interval_time   ? 
_diffrn_standards_decay_%         ? 
_diffrn_reflns_number             54498 
_diffrn_reflns_av_R_equivalents   0.0873 
_diffrn_reflns_av_sigmaI/netI     0.0748 
_diffrn_reflns_limit_h_min        -12 
_diffrn_reflns_limit_h_max        12 
_diffrn_reflns_limit_k_min        -21 
_diffrn_reflns_limit_k_max        19 
_diffrn_reflns_limit_l_min        -37 
_diffrn_reflns_limit_l_max        49 
_diffrn_reflns_theta_min          2.71 
_diffrn_reflns_theta_max          67.50 
_reflns_number_total              14180 
_reflns_number_gt                 9814 
_reflns_threshold_expression      >2sigma(I) 
 
_computing_data_collection
;
CrysAlisPro, Agilent Technologies,
Version 1.171.37.31 (release 14-01-2014 CrysAlis171 .NET)
(compiled Jan 14 2014,18:38:05)
;
_computing_cell_refinement
;
CrysAlisPro, Agilent Technologies,
Version 1.171.37.31 (release 14-01-2014 CrysAlis171 .NET)
(compiled Jan 14 2014,18:38:05)
;
_computing_data_reduction
;
CrysAlisPro, Agilent Technologies,
Version 1.171.37.31 (release 14-01-2014 CrysAlis171 .NET)
(compiled Jan 14 2014,18:38:05)
;
_computing_structure_solution     'SHELXS-97 (Sheldrick, 1990)' 
_computing_structure_refinement   'SHELXL-97 (Sheldrick, 1997)' 
_computing_molecular_graphics     ? 
_computing_publication_material   ? 
 
_refine_special_details 
; 
 Refinement of F^2^ against ALL reflections.  The weighted R-factor wR and 
 goodness of fit S are based on F^2^, conventional R-factors R are based 
 on F, with F set to zero for negative F^2^. The threshold expression of 
 F^2^ > 2sigma(F^2^) is used only for calculating R-factors(gt) etc. and is 
 not relevant to the choice of reflections for refinement.  R-factors based 
 on F^2^ are statistically about twice as large as those based on F, and R- 
 factors based on ALL data will be even larger. 
; 
 
_refine_ls_structure_factor_coef  Fsqd  
_refine_ls_matrix_type            full 
_refine_ls_weighting_scheme       calc  
_refine_ls_weighting_details 
 'calc w=1/[\s^2^(Fo^2^)+(0.0623P)^2^+14.4520P] where P=(Fo^2^+2Fc^2^)/3' 
_atom_sites_solution_primary      direct 
_atom_sites_solution_secondary    difmap 
_atom_sites_solution_hydrogens    geom 
_refine_ls_hydrogen_treatment     constr 
_refine_ls_extinction_method      none 
_refine_ls_extinction_coef        ? 
_refine_ls_number_reflns          14180 
_refine_ls_number_parameters      939 
_refine_ls_number_restraints      231 
_refine_ls_R_factor_all           0.1079 
_refine_ls_R_factor_gt            0.0789 
_refine_ls_wR_factor_ref          0.1973 
_refine_ls_wR_factor_gt           0.1803 
_refine_ls_goodness_of_fit_ref    1.037 
_refine_ls_restrained_S_all       1.068 
_refine_ls_shift/su_max           0.004 
_refine_ls_shift/su_mean          0.000 
 
loop_ 
 _atom_site_label 
 _atom_site_type_symbol 
 _atom_site_fract_x 
 _atom_site_fract_y 
 _atom_site_fract_z 
 _atom_site_U_iso_or_equiv 
 _atom_site_adp_type 
 _atom_site_occupancy 
 _atom_site_symmetry_multiplicity 
 _atom_site_calc_flag 
 _atom_site_refinement_flags 
 _atom_site_disorder_assembly 
 _atom_site_disorder_group 
Si1 Si 0.17097(9) 0.19044(6) 0.38390(2) 0.0254(2) Uani 1 1 d . . . 
Si2 Si 0.34609(9) 0.31796(6) 0.41784(2) 0.0246(2) Uani 1 1 d . . . 
Si3 Si 0.19067(9) 0.39045(6) 0.36168(2) 0.0240(2) Uani 1 1 d . . . 
Si4 Si 0.32131(9) 0.25089(6) 0.33350(2) 0.0246(2) Uani 1 1 d . . . 
O1 O 0.2566(2) 0.24464(14) 0.40928(5) 0.0286(6) Uani 1 1 d . . . 
O2 O 0.2818(2) 0.38803(14) 0.39695(5) 0.0271(6) Uani 1 1 d . . . 
O3 O 0.2557(2) 0.33250(14) 0.33837(5) 0.0276(6) Uani 1 1 d . . . 
O4 O 0.2394(2) 0.18653(14) 0.35044(6) 0.0292(6) Uani 1 1 d . . . 
O5 O 0.0324(2) 0.22392(15) 0.37670(6) 0.0318(6) Uani 1 1 d . . . 
H5A H 0.0360 0.2695 0.3716 0.038 Uiso 1 1 calc R . . 
O6 O 0.4823(2) 0.29999(15) 0.40768(6) 0.0303(6) Uani 1 1 d . . . 
H6A H 0.4747 0.2827 0.3887 0.036 Uiso 1 1 calc R . . 
O7 O 0.0515(2) 0.36598(15) 0.36501(6) 0.0305(6) Uani 1 1 d . . . 
O8 O 0.4618(2) 0.24998(16) 0.35040(6) 0.0315(6) Uani 1 1 d . . . 
C1 C 0.1633(4) 0.0920(2) 0.40065(9) 0.0315(9) Uani 1 1 d . . . 
C2 C 0.2168(4) 0.0676(2) 0.43237(9) 0.0354(9) Uani 1 1 d . . . 
C3 C 0.2088(5) -0.0073(3) 0.44100(11) 0.0459(11) Uani 1 1 d . . . 
H3A H 0.2457 -0.0223 0.4620 0.055 Uiso 1 1 calc R . . 
C4 C 0.1495(5) -0.0615(3) 0.42045(13) 0.0545(13) Uani 1 1 d . B . 
C5 C 0.0944(5) -0.0383(3) 0.39012(11) 0.0479(11) Uani 1 1 d . . . 
H5B H 0.0509 -0.0739 0.3758 0.058 Uiso 1 1 calc R . . 
C6 C 0.1014(4) 0.0362(2) 0.38010(10) 0.0360(9) Uani 1 1 d . . . 
C7 C 0.2844(4) 0.1207(3) 0.45766(9) 0.0397(10) Uani 1 1 d . . . 
H7B H 0.2566 0.1731 0.4516 0.048 Uiso 1 1 calc R . . 
C8 C 0.4250(5) 0.1174(3) 0.45725(12) 0.0602(14) Uani 1 1 d . . . 
H8B H 0.4452 0.1340 0.4360 0.090 Uiso 1 1 calc R . . 
H8C H 0.4542 0.0657 0.4613 0.090 Uiso 1 1 calc R . . 
H8D H 0.4664 0.1505 0.4742 0.090 Uiso 1 1 calc R . . 
C9 C 0.2533(6) 0.1057(3) 0.49247(11) 0.0690(17) Uani 1 1 d . . . 
H9A H 0.2838 0.1476 0.5067 0.103 Uiso 1 1 calc R . . 
H9B H 0.2937 0.0589 0.5007 0.103 Uiso 1 1 calc R . . 
H9C H 0.1626 0.1010 0.4921 0.103 Uiso 1 1 calc R . . 
C10 C 0.1427(7) -0.1434(3) 0.43070(17) 0.0774(16) Uani 1 1 d U . . 
H10 H 0.1149 -0.1660 0.4089 0.093 Uiso 1 1 calc R A 3 
C11 C 0.0327(15) -0.1604(9) 0.4464(4) 0.092(3) Uani 0.50 1 d PU B 3 
H11A H 0.0331 -0.2138 0.4523 0.138 Uiso 0.50 1 calc PR B 3 
H11B H -0.0428 -0.1491 0.4314 0.138 Uiso 0.50 1 calc PR B 3 
H11C H 0.0335 -0.1297 0.4661 0.138 Uiso 0.50 1 calc PR B 3 
C12 C 0.2859(16) -0.1779(11) 0.4365(5) 0.081(3) Uani 0.50 1 d PU B 3 
H12A H 0.3373 -0.1530 0.4218 0.121 Uiso 0.50 1 calc PR B 3 
H12B H 0.2833 -0.2321 0.4321 0.121 Uiso 0.50 1 calc PR B 3 
H12C H 0.3221 -0.1691 0.4591 0.121 Uiso 0.50 1 calc PR B 3 
C11A C 0.0897(13) -0.1552(8) 0.4606(3) 0.077(3) Uani 0.50 1 d PU B 4 
H11D H 0.0182 -0.1215 0.4613 0.115 Uiso 0.50 1 calc PR B 4 
H11E H 0.1530 -0.1447 0.4792 0.115 Uiso 0.50 1 calc PR B 4 
H11F H 0.0619 -0.2076 0.4617 0.115 Uiso 0.50 1 calc PR B 4 
C12A C 0.2374(16) -0.1834(11) 0.4268(4) 0.082(3) Uani 0.50 1 d PU B 4 
H12D H 0.2665 -0.1706 0.4060 0.122 Uiso 0.50 1 calc PR B 4 
H12E H 0.2143 -0.2367 0.4268 0.122 Uiso 0.50 1 calc PR B 4 
H12F H 0.3043 -0.1737 0.4446 0.122 Uiso 0.50 1 calc PR B 4 
C13 C 0.0371(4) 0.0539(2) 0.34573(10) 0.0375(9) Uani 1 1 d . . . 
H13A H 0.0575 0.1072 0.3406 0.045 Uiso 1 1 calc R . . 
C14 C -0.1047(5) 0.0479(3) 0.34421(13) 0.0624(14) Uani 1 1 d . . . 
H14A H -0.1341 0.0836 0.3596 0.094 Uiso 1 1 calc R . . 
H14B H -0.1272 -0.0033 0.3499 0.094 Uiso 1 1 calc R . . 
H14C H -0.1436 0.0597 0.3221 0.094 Uiso 1 1 calc R . . 
C15 C 0.0862(5) 0.0037(3) 0.32031(11) 0.0566(13) Uani 1 1 d . . . 
H15A H 0.1764 0.0114 0.3208 0.085 Uiso 1 1 calc R . . 
H15B H 0.0439 0.0164 0.2987 0.085 Uiso 1 1 calc R . . 
H15C H 0.0699 -0.0491 0.3251 0.085 Uiso 1 1 calc R . . 
C16 C 0.3507(4) 0.3351(2) 0.46277(8) 0.0307(8) Uani 1 1 d . C . 
C17 C 0.4639(4) 0.3411(3) 0.48437(10) 0.0474(12) Uani 1 1 d . . . 
C18 C 0.4603(5) 0.3389(4) 0.51766(10) 0.0688(18) Uani 1 1 d . C . 
H18A H 0.5369 0.3420 0.5317 0.083 Uiso 1 1 calc R . . 
C19 C 0.3513(5) 0.3326(4) 0.53128(10) 0.0609(15) Uani 1 1 d . . . 
C20 C 0.2397(4) 0.3315(3) 0.51064(9) 0.0457(11) Uani 1 1 d . C . 
H20A H 0.1629 0.3291 0.5196 0.055 Uiso 1 1 calc R . . 
C21 C 0.2385(4) 0.3338(2) 0.47663(9) 0.0338(9) Uani 1 1 d . . . 
C22 C 0.5915(19) 0.3436(9) 0.4738(5) 0.052(3) Uani 0.50 1 d PU C 9 
H22A H 0.5866 0.3203 0.4517 0.062 Uiso 0.50 1 calc PR C 9 
C23 C 0.6983(15) 0.3045(11) 0.4962(3) 0.058(3) Uani 0.50 1 d PU C 9 
H23A H 0.6801 0.2507 0.4976 0.087 Uiso 0.50 1 calc PR C 9 
H23B H 0.7049 0.3269 0.5180 0.087 Uiso 0.50 1 calc PR C 9 
H23C H 0.7774 0.3113 0.4872 0.087 Uiso 0.50 1 calc PR C 9 
C24 C 0.6198(15) 0.4262(9) 0.4706(3) 0.059(3) Uani 0.50 1 d PU C 9 
H24A H 0.5510 0.4505 0.4568 0.088 Uiso 0.50 1 calc PR C 9 
H24B H 0.6974 0.4322 0.4609 0.088 Uiso 0.50 1 calc PR C 9 
H24C H 0.6293 0.4496 0.4922 0.088 Uiso 0.50 1 calc PR C 9 
C22A C 0.5876(19) 0.3684(10) 0.4710(5) 0.051(3) Uani 0.50 1 d PU C 10 
H22B H 0.5752 0.3625 0.4468 0.061 Uiso 0.50 1 calc PR C 10 
C23A C 0.6947(14) 0.3173(10) 0.4845(3) 0.055(3) Uani 0.50 1 d PU C 10 
H23D H 0.7722 0.3345 0.4768 0.082 Uiso 0.50 1 calc PR C 10 
H23E H 0.6767 0.2656 0.4771 0.082 Uiso 0.50 1 calc PR C 10 
H23F H 0.7043 0.3190 0.5083 0.082 Uiso 0.50 1 calc PR C 10 
C24A C 0.6192(16) 0.4522(9) 0.4788(3) 0.057(3) Uani 0.50 1 d PU C 10 
H24D H 0.6952 0.4662 0.4695 0.085 Uiso 0.50 1 calc PR C 10 
H24E H 0.6326 0.4594 0.5024 0.085 Uiso 0.50 1 calc PR C 10 
H24F H 0.5497 0.4840 0.4694 0.085 Uiso 0.50 1 calc PR C 10 
C25 C 0.357(2) 0.3408(8) 0.5675(4) 0.069(2) Uani 0.50 1 d PU C 5 
H25A H 0.4391 0.3654 0.5752 0.083 Uiso 0.50 1 calc PR C 5 
C26 C 0.2630(13) 0.3837(8) 0.5803(2) 0.074(2) Uani 0.50 1 d PU C 5 
H26A H 0.2684 0.4364 0.5736 0.111 Uiso 0.50 1 calc PR C 5 
H26B H 0.2753 0.3808 0.6041 0.111 Uiso 0.50 1 calc PR C 5 
H26C H 0.1805 0.3636 0.5721 0.111 Uiso 0.50 1 calc PR C 5 
C27 C 0.3678(13) 0.2585(8) 0.5792(2) 0.073(2) Uani 0.50 1 d PU C 5 
H27A H 0.3753 0.2572 0.6030 0.109 Uiso 0.50 1 calc PR C 5 
H27B H 0.4419 0.2353 0.5719 0.109 Uiso 0.50 1 calc PR C 5 
H27C H 0.2930 0.2308 0.5701 0.109 Uiso 0.50 1 calc PR C 5 
C25A C 0.351(2) 0.3135(9) 0.5684(5) 0.070(2) Uani 0.50 1 d PU C 6 
H25B H 0.4252 0.2801 0.5746 0.085 Uiso 0.50 1 calc PR C 6 
C26A C 0.3773(14) 0.3818(8) 0.5854(2) 0.080(2) Uani 0.50 1 d PU C 6 
H26D H 0.3730 0.3737 0.6087 0.119 Uiso 0.50 1 calc PR C 6 
H26E H 0.3157 0.4198 0.5771 0.119 Uiso 0.50 1 calc PR C 6 
H26F H 0.4613 0.3991 0.5823 0.119 Uiso 0.50 1 calc PR C 6 
C27A C 0.2375(12) 0.2708(8) 0.5776(2) 0.073(2) Uani 0.50 1 d PU C 6 
H27D H 0.2509 0.2581 0.6008 0.110 Uiso 0.50 1 calc PR C 6 
H27E H 0.2258 0.2245 0.5647 0.110 Uiso 0.50 1 calc PR C 6 
H27F H 0.1629 0.3024 0.5731 0.110 Uiso 0.50 1 calc PR C 6 
C28 C 0.1089(4) 0.3392(3) 0.45659(9) 0.0384(10) Uani 1 1 d . C . 
H28A H 0.1211 0.3438 0.4331 0.046 Uiso 1 1 calc R . . 
C29 C 0.0414(4) 0.4091(3) 0.46593(11) 0.0508(12) Uani 1 1 d . . . 
H29A H 0.0966 0.4528 0.4656 0.076 Uiso 1 1 calc R C . 
H29B H 0.0177 0.4028 0.4878 0.076 Uiso 1 1 calc R . . 
H29C H -0.0339 0.4168 0.4504 0.076 Uiso 1 1 calc R . . 
C30 C 0.0286(4) 0.2700(3) 0.46024(11) 0.0500(12) Uani 1 1 d . . . 
H30A H 0.0702 0.2254 0.4528 0.075 Uiso 1 1 calc R C . 
H30B H -0.0529 0.2764 0.4471 0.075 Uiso 1 1 calc R . . 
H30C H 0.0167 0.2638 0.4831 0.075 Uiso 1 1 calc R . . 
C31 C 0.2010(3) 0.4916(2) 0.34685(8) 0.0260(8) Uani 1 1 d . . . 
C32 C 0.1881(4) 0.5506(2) 0.36918(9) 0.0300(8) Uani 1 1 d . . . 
C33 C 0.2117(4) 0.6246(2) 0.36132(9) 0.0364(9) Uani 1 1 d . . . 
H33A H 0.2045 0.6628 0.3770 0.044 Uiso 1 1 calc R . . 
C34 C 0.2454(4) 0.6447(2) 0.33131(10) 0.0374(9) Uani 1 1 d . . . 
C35 C 0.2496(4) 0.5880(2) 0.30858(9) 0.0346(9) Uani 1 1 d . . . 
H35A H 0.2684 0.6008 0.2875 0.042 Uiso 1 1 calc R . . 
C36 C 0.2271(3) 0.5127(2) 0.31546(9) 0.0285(8) Uani 1 1 d . . . 
C37 C 0.1498(4) 0.5368(2) 0.40305(9) 0.0363(9) Uani 1 1 d . . . 
H37A H 0.1270 0.4825 0.4045 0.044 Uiso 1 1 calc R . . 
C38 C 0.0350(5) 0.5837(3) 0.40860(12) 0.0582(14) Uani 1 1 d . . . 
H38A H -0.0330 0.5736 0.3911 0.087 Uiso 1 1 calc R . . 
H38B H 0.0565 0.6372 0.4086 0.087 Uiso 1 1 calc R . . 
H38C H 0.0082 0.5701 0.4296 0.087 Uiso 1 1 calc R . . 
C39 C 0.2600(5) 0.5525(3) 0.42934(10) 0.0572(14) Uani 1 1 d . . . 
H39A H 0.3297 0.5191 0.4262 0.086 Uiso 1 1 calc R . . 
H39B H 0.2342 0.5435 0.4509 0.086 Uiso 1 1 calc R . . 
H39C H 0.2864 0.6050 0.4278 0.086 Uiso 1 1 calc R . . 
C40 C 0.2756(5) 0.7252(3) 0.32354(12) 0.0540(13) Uani 1 1 d . . . 
H40A H 0.3002 0.7259 0.3011 0.065 Uiso 1 1 calc R . . 
C41 C 0.1621(6) 0.7763(3) 0.32364(15) 0.0768(18) Uani 1 1 d . . . 
H41A H 0.0910 0.7548 0.3096 0.115 Uiso 1 1 calc R . . 
H41B H 0.1813 0.8262 0.3155 0.115 Uiso 1 1 calc R . . 
H41C H 0.1411 0.7810 0.3459 0.115 Uiso 1 1 calc R . . 
C42 C 0.3862(6) 0.7556(3) 0.34669(16) 0.0775(18) Uani 1 1 d . . . 
H42A H 0.4583 0.7222 0.3463 0.116 Uiso 1 1 calc R . . 
H42B H 0.3634 0.7579 0.3688 0.116 Uiso 1 1 calc R . . 
H42C H 0.4077 0.8061 0.3397 0.116 Uiso 1 1 calc R . . 
C43 C 0.2341(4) 0.4568(2) 0.28785(9) 0.0335(9) Uani 1 1 d . . . 
H43A H 0.2010 0.4075 0.2947 0.040 Uiso 1 1 calc R . . 
C44 C 0.3698(4) 0.4441(3) 0.28103(10) 0.0441(11) Uani 1 1 d . . . 
H44A H 0.4201 0.4259 0.3008 0.066 Uiso 1 1 calc R . . 
H44B H 0.4045 0.4916 0.2742 0.066 Uiso 1 1 calc R . . 
H44C H 0.3710 0.4067 0.2637 0.066 Uiso 1 1 calc R . . 
C45 C 0.1536(5) 0.4815(3) 0.25652(9) 0.0448(11) Uani 1 1 d . . . 
H45A H 0.0684 0.4920 0.2612 0.067 Uiso 1 1 calc R . . 
H45B H 0.1515 0.4412 0.2403 0.067 Uiso 1 1 calc R . . 
H45C H 0.1893 0.5270 0.2481 0.067 Uiso 1 1 calc R . . 
C46 C 0.3052(4) 0.2406(2) 0.28746(9) 0.0312(8) Uani 1 1 d . D . 
C47 C 0.4111(4) 0.2331(3) 0.27073(9) 0.0422(11) Uani 1 1 d D . . 
C48 C 0.4018(4) 0.2524(3) 0.23773(9) 0.0455(11) Uani 1 1 d . D . 
H48A H 0.4745 0.2491 0.2270 0.055 Uiso 1 1 calc R . . 
C49 C 0.2918(4) 0.2760(3) 0.22017(9) 0.0428(11) Uani 1 1 d D . . 
C50 C 0.1847(4) 0.2749(3) 0.23573(9) 0.0401(10) Uani 1 1 d . D . 
H50A H 0.1064 0.2865 0.2236 0.048 Uiso 1 1 calc R . . 
C51 C 0.1893(4) 0.2572(2) 0.26875(9) 0.0339(9) Uani 1 1 d . . . 
C52 C 0.0654(4) 0.2502(3) 0.28286(10) 0.0429(11) Uani 1 1 d . D . 
H52A H 0.0854 0.2456 0.3070 0.052 Uiso 1 1 calc R . . 
C53 C 0.0013(5) 0.1779(3) 0.27043(13) 0.0636(15) Uani 1 1 d . . . 
H53A H -0.0699 0.1680 0.2823 0.095 Uiso 1 1 calc R D . 
H53B H 0.0607 0.1360 0.2738 0.095 Uiso 1 1 calc R . . 
H53C H -0.0281 0.1829 0.2472 0.095 Uiso 1 1 calc R . . 
C54 C -0.0229(4) 0.3163(3) 0.27608(11) 0.0546(13) Uani 1 1 d . . . 
H54A H 0.0171 0.3621 0.2856 0.082 Uiso 1 1 calc R D . 
H54B H -0.0998 0.3067 0.2857 0.082 Uiso 1 1 calc R . . 
H54C H -0.0432 0.3229 0.2525 0.082 Uiso 1 1 calc R . . 
C55 C 0.5490(17) 0.2422(16) 0.2925(6) 0.071(3) Uani 0.237(8) 1 d PDU D 7 
H55 H 0.5374 0.2029 0.3091 0.106 Uiso 0.237(8) 1 calc PR D 7 
C56 C 0.623(2) 0.3135(14) 0.3208(6) 0.076(4) Uani 0.237(8) 1 d PDU D 7 
H56A H 0.7105 0.2997 0.3275 0.114 Uiso 0.237(8) 1 calc PR D 7 
H56B H 0.5787 0.3161 0.3400 0.114 Uiso 0.237(8) 1 calc PR D 7 
H56C H 0.6196 0.3626 0.3100 0.114 Uiso 0.237(8) 1 calc PR D 7 
C57 C 0.621(3) 0.1868(19) 0.2672(6) 0.072(3) Uani 0.237(8) 1 d PDU D 7 
H57A H 0.5588 0.1567 0.2537 0.109 Uiso 0.237(8) 1 calc PR D 7 
H57B H 0.6803 0.1533 0.2801 0.109 Uiso 0.237(8) 1 calc PR D 7 
H57C H 0.6666 0.2184 0.2533 0.109 Uiso 0.237(8) 1 calc PR D 7 
C55A C 0.5351(6) 0.2034(4) 0.28719(16) 0.0603(19) Uani 0.763(8) 1 d PDU D 8 
H55A H 0.5237 0.1862 0.3096 0.072 Uiso 0.763(8) 1 calc PR D 8 
C56A C 0.6387(7) 0.2760(5) 0.2902(2) 0.085(2) Uani 0.763(8) 1 d PDU D 8 
H56D H 0.6521 0.2927 0.2684 0.127 Uiso 0.763(8) 1 calc PR D 8 
H56E H 0.7183 0.2592 0.3021 0.127 Uiso 0.763(8) 1 calc PR D 8 
H56F H 0.6054 0.3177 0.3020 0.127 Uiso 0.763(8) 1 calc PR D 8 
C57A C 0.5934(9) 0.1428(6) 0.2706(2) 0.083(3) Uani 0.763(8) 1 d PDU D 8 
H57D H 0.5433 0.0969 0.2712 0.124 Uiso 0.763(8) 1 calc PR D 8 
H57E H 0.6778 0.1336 0.2817 0.124 Uiso 0.763(8) 1 calc PR D 8 
H57F H 0.5981 0.1572 0.2480 0.124 Uiso 0.763(8) 1 calc PR D 8 
C58 C 0.2934(5) 0.3056(3) 0.18553(10) 0.0610(15) Uani 1 1 d D D . 
H58A H 0.3531 0.2739 0.1749 0.073 Uiso 1 1 calc R . . 
C59 C 0.3445(8) 0.3887(4) 0.18689(15) 0.091(2) Uani 1 1 d . . . 
H59A H 0.3458 0.4075 0.1647 0.137 Uiso 1 1 calc R D . 
H59B H 0.4294 0.3895 0.1985 0.137 Uiso 1 1 calc R . . 
H59C H 0.2901 0.4207 0.1983 0.137 Uiso 1 1 calc R . . 
C60 C 0.1724(7) 0.3036(5) 0.16485(13) 0.106(3) Uani 1 1 d . . . 
H60A H 0.1411 0.2518 0.1634 0.158 Uiso 1 1 calc R D . 
H60B H 0.1829 0.3218 0.1430 0.158 Uiso 1 1 calc R . . 
H60C H 0.1126 0.3358 0.1743 0.158 Uiso 1 1 calc R . . 
N1 N 0.6848(3) 0.1215(2) 0.40236(9) 0.0482(9) Uani 1 1 d . . . 
N2 N 0.5397(3) 0.0456(2) 0.38393(9) 0.0427(9) Uani 1 1 d . . . 
C61 C 0.5769(4) 0.1159(3) 0.38295(10) 0.0414(10) Uani 1 1 d . . . 
H61A H 0.5346 0.1554 0.3707 0.050 Uiso 1 1 calc R . . 
C62 C 0.7154(5) 0.0522(3) 0.41612(11) 0.0521(13) Uani 1 1 d . . . 
C63 C 0.6256(5) 0.0041(3) 0.40488(12) 0.0507(12) Uani 1 1 d . . . 
C64 C 0.7535(5) 0.1914(3) 0.40911(17) 0.0800(19) Uani 1 1 d . . . 
H64A H 0.7084 0.2327 0.3972 0.120 Uiso 1 1 calc R . . 
H64B H 0.8368 0.1865 0.4022 0.120 Uiso 1 1 calc R . . 
H64C H 0.7616 0.2019 0.4325 0.120 Uiso 1 1 calc R . . 
C65 C 0.8335(5) 0.0404(5) 0.43910(14) 0.090(2) Uani 1 1 d . . . 
H65A H 0.8418 -0.0130 0.4449 0.135 Uiso 1 1 calc R . . 
H65B H 0.8301 0.0703 0.4588 0.135 Uiso 1 1 calc R . . 
H65C H 0.9056 0.0561 0.4285 0.135 Uiso 1 1 calc R . . 
C66 C 0.6071(7) -0.0767(3) 0.41210(16) 0.086(2) Uani 1 1 d . . . 
H66A H 0.6765 -0.0945 0.4278 0.129 Uiso 1 1 calc R . . 
H66B H 0.6042 -0.1061 0.3920 0.129 Uiso 1 1 calc R . . 
H66C H 0.5283 -0.0830 0.4213 0.129 Uiso 1 1 calc R . . 
C67 C 0.4229(5) 0.0167(3) 0.36676(14) 0.0663(15) Uani 1 1 d . . . 
H67A H 0.3765 0.0579 0.3551 0.099 Uiso 1 1 calc R . . 
H67B H 0.3724 -0.0052 0.3825 0.099 Uiso 1 1 calc R . . 
H67C H 0.4414 -0.0221 0.3512 0.099 Uiso 1 1 calc R . . 
N3 N 0.8031(3) 0.5182(3) 0.32768(9) 0.0521(11) Uani 1 1 d . . . 
N4 N 0.7477(4) 0.4368(3) 0.36085(11) 0.0620(13) Uani 1 1 d . . . 
C68 C 0.8412(4) 0.4589(3) 0.34521(12) 0.0520(13) Uani 1 1 d . . . 
H68A H 0.9213 0.4361 0.3464 0.062 Uiso 1 1 calc R . . 
C69 C 0.6790(4) 0.5339(3) 0.33193(11) 0.0450(11) Uani 1 1 d . . . 
C70 C 0.6451(4) 0.4824(3) 0.35286(11) 0.0447(11) Uani 1 1 d . . . 
C71 C 0.8787(6) 0.5616(5) 0.30756(18) 0.105(3) Uani 1 1 d . . . 
H71A H 0.9656 0.5444 0.3115 0.157 Uiso 1 1 calc R . . 
H71B H 0.8747 0.6150 0.3131 0.157 Uiso 1 1 calc R . . 
H71C H 0.8466 0.5545 0.2846 0.157 Uiso 1 1 calc R . . 
C72 C 0.6085(5) 0.5978(3) 0.31561(17) 0.080(2) Uani 1 1 d . . . 
H72A H 0.5221 0.5966 0.3206 0.119 Uiso 1 1 calc R . . 
H72B H 0.6091 0.5939 0.2920 0.119 Uiso 1 1 calc R . . 
H72C H 0.6478 0.6453 0.3234 0.119 Uiso 1 1 calc R . . 
C73 C 0.5261(4) 0.4703(4) 0.36714(12) 0.0634(16) Uani 1 1 d . . . 
H73A H 0.4660 0.5097 0.3594 0.095 Uiso 1 1 calc R . . 
H73B H 0.5428 0.4725 0.3909 0.095 Uiso 1 1 calc R . . 
H73C H 0.4914 0.4209 0.3605 0.095 Uiso 1 1 calc R . . 
C74 C 0.7524(6) 0.3715(5) 0.3825(2) 0.150(5) Uani 1 1 d . . . 
H74A H 0.8316 0.3447 0.3819 0.225 Uiso 1 1 calc R . . 
H74B H 0.6826 0.3377 0.3752 0.225 Uiso 1 1 calc R . . 
H74C H 0.7463 0.3882 0.4047 0.225 Uiso 1 1 calc R . . 
 
loop_ 
 _atom_site_aniso_label 
 _atom_site_aniso_U_11 
 _atom_site_aniso_U_22 
 _atom_site_aniso_U_33 
 _atom_site_aniso_U_23 
 _atom_site_aniso_U_13 
 _atom_site_aniso_U_12 
Si1 0.0273(5) 0.0314(5) 0.0167(5) 0.0003(4) -0.0008(4) -0.0035(4) 
Si2 0.0245(5) 0.0348(6) 0.0133(4) -0.0010(4) -0.0025(4) -0.0010(4) 
Si3 0.0243(5) 0.0309(5) 0.0157(4) 0.0005(4) -0.0013(4) 0.0026(4) 
Si4 0.0262(5) 0.0332(5) 0.0139(4) -0.0008(4) 0.0003(4) 0.0029(4) 
O1 0.0333(14) 0.0354(14) 0.0159(12) -0.0012(11) -0.0016(10) -0.0061(11) 
O2 0.0300(13) 0.0355(14) 0.0135(11) 0.0004(11) -0.0063(10) -0.0020(11) 
O3 0.0329(14) 0.0331(14) 0.0164(12) 0.0006(10) 0.0006(10) 0.0045(11) 
O4 0.0355(14) 0.0336(14) 0.0176(12) -0.0004(11) 0.0002(10) 0.0016(12) 
O5 0.0271(13) 0.0356(15) 0.0313(14) 0.0038(12) -0.0015(11) -0.0024(11) 
O6 0.0236(13) 0.0488(16) 0.0167(12) -0.0059(11) -0.0038(10) 0.0011(11) 
O7 0.0241(13) 0.0384(15) 0.0284(13) 0.0050(12) 0.0007(10) 0.0012(11) 
O8 0.0254(13) 0.0468(16) 0.0221(12) -0.0026(12) 0.0021(10) 0.0046(12) 
C1 0.033(2) 0.037(2) 0.0242(19) 0.0021(17) 0.0029(16) -0.0033(17) 
C2 0.040(2) 0.039(2) 0.027(2) 0.0085(18) 0.0044(17) -0.0009(18) 
C3 0.057(3) 0.045(3) 0.035(2) 0.014(2) 0.002(2) -0.001(2) 
C4 0.065(3) 0.037(3) 0.061(3) 0.014(2) 0.006(3) -0.006(2) 
C5 0.053(3) 0.038(2) 0.050(3) -0.001(2) -0.003(2) -0.009(2) 
C6 0.039(2) 0.035(2) 0.033(2) 0.0029(18) 0.0017(17) -0.0049(18) 
C7 0.051(3) 0.051(3) 0.0164(18) 0.0068(18) 0.0012(17) -0.003(2) 
C8 0.051(3) 0.075(4) 0.050(3) -0.008(3) -0.012(2) 0.000(3) 
C9 0.113(5) 0.071(4) 0.025(2) 0.010(2) 0.013(3) -0.005(3) 
C10 0.091(4) 0.052(3) 0.088(4) 0.026(3) 0.011(3) -0.001(3) 
C11 0.103(6) 0.065(5) 0.111(7) 0.034(6) 0.025(5) -0.005(6) 
C12 0.099(6) 0.053(5) 0.090(7) 0.021(5) 0.010(5) 0.009(5) 
C11A 0.083(6) 0.057(5) 0.090(6) 0.031(5) 0.011(4) 0.001(5) 
C12A 0.106(7) 0.054(5) 0.086(7) 0.020(5) 0.017(5) 0.007(5) 
C13 0.039(2) 0.038(2) 0.032(2) -0.0040(18) -0.0084(17) -0.0055(18) 
C14 0.043(3) 0.086(4) 0.054(3) 0.006(3) -0.008(2) -0.007(3) 
C15 0.064(3) 0.061(3) 0.042(3) -0.012(2) -0.008(2) 0.006(3) 
C16 0.032(2) 0.042(2) 0.0177(18) -0.0022(16) 0.0026(15) -0.0006(17) 
C17 0.031(2) 0.087(4) 0.022(2) -0.015(2) -0.0045(16) 0.000(2) 
C18 0.039(3) 0.147(6) 0.017(2) -0.016(3) -0.0080(18) 0.009(3) 
C19 0.053(3) 0.113(5) 0.015(2) -0.002(2) -0.0012(19) 0.009(3) 
C20 0.040(2) 0.076(3) 0.021(2) -0.003(2) 0.0078(17) -0.002(2) 
C21 0.034(2) 0.047(2) 0.0195(18) -0.0020(17) 0.0003(15) -0.0031(18) 
C22 0.034(3) 0.098(7) 0.021(3) -0.016(5) -0.004(3) -0.003(5) 
C23 0.040(4) 0.105(6) 0.027(6) -0.015(5) -0.004(5) 0.008(4) 
C24 0.044(4) 0.102(7) 0.029(5) -0.007(5) -0.001(4) -0.008(5) 
C22A 0.035(3) 0.094(7) 0.021(3) -0.017(5) -0.006(3) -0.006(4) 
C23A 0.040(3) 0.098(6) 0.026(5) -0.016(5) 0.001(4) 0.001(4) 
C24A 0.050(4) 0.091(7) 0.028(5) -0.014(5) -0.003(4) -0.008(5) 
C25 0.091(4) 0.100(6) 0.016(3) -0.001(4) 0.008(3) 0.004(5) 
C26 0.094(5) 0.105(6) 0.023(4) -0.007(4) 0.008(4) 0.008(5) 
C27 0.091(5) 0.103(6) 0.026(4) 0.009(4) 0.012(4) 0.007(5) 
C25A 0.091(4) 0.103(6) 0.018(3) 0.001(4) 0.009(3) 0.005(5) 
C26A 0.104(5) 0.111(6) 0.025(4) -0.006(4) 0.011(4) -0.002(5) 
C27A 0.093(5) 0.100(6) 0.028(4) 0.010(4) 0.011(4) 0.007(5) 
C28 0.032(2) 0.062(3) 0.0221(19) -0.0027(19) 0.0070(16) -0.004(2) 
C29 0.043(3) 0.070(3) 0.041(3) 0.000(2) 0.009(2) 0.006(2) 
C30 0.034(2) 0.070(3) 0.047(3) -0.013(2) 0.010(2) -0.009(2) 
C31 0.0202(17) 0.035(2) 0.0219(18) -0.0007(16) -0.0007(14) 0.0026(15) 
C32 0.032(2) 0.035(2) 0.0227(18) -0.0005(16) -0.0001(15) 0.0034(16) 
C33 0.044(2) 0.037(2) 0.028(2) -0.0039(18) 0.0033(17) 0.0000(19) 
C34 0.044(2) 0.034(2) 0.035(2) 0.0023(18) 0.0085(18) 0.0024(18) 
C35 0.039(2) 0.039(2) 0.027(2) 0.0070(18) 0.0060(17) 0.0049(18) 
C36 0.0254(18) 0.037(2) 0.0222(18) 0.0016(16) -0.0014(14) 0.0068(16) 
C37 0.048(2) 0.038(2) 0.0232(19) -0.0040(17) 0.0063(17) -0.0001(19) 
C38 0.084(4) 0.049(3) 0.049(3) -0.002(2) 0.037(3) 0.010(3) 
C39 0.087(4) 0.058(3) 0.025(2) -0.006(2) 0.001(2) -0.021(3) 
C40 0.085(4) 0.038(3) 0.043(3) 0.002(2) 0.025(3) 0.000(3) 
C41 0.102(5) 0.046(3) 0.078(4) 0.007(3) -0.009(4) 0.011(3) 
C42 0.062(4) 0.062(4) 0.111(5) 0.000(4) 0.020(3) -0.021(3) 
C43 0.038(2) 0.040(2) 0.0212(19) 0.0045(17) -0.0007(16) 0.0063(18) 
C44 0.052(3) 0.050(3) 0.032(2) -0.004(2) 0.0109(19) 0.007(2) 
C45 0.062(3) 0.048(3) 0.022(2) 0.0059(19) -0.0040(19) 0.009(2) 
C46 0.037(2) 0.037(2) 0.0195(18) -0.0040(16) 0.0031(15) 0.0034(17) 
C47 0.046(2) 0.058(3) 0.024(2) 0.0014(19) 0.0094(18) 0.019(2) 
C48 0.053(3) 0.063(3) 0.022(2) 0.004(2) 0.0135(18) 0.024(2) 
C49 0.058(3) 0.055(3) 0.0176(19) 0.0020(19) 0.0100(18) 0.019(2) 
C50 0.045(2) 0.057(3) 0.0161(18) -0.0047(18) -0.0051(16) 0.010(2) 
C51 0.035(2) 0.043(2) 0.0217(18) -0.0036(17) -0.0007(15) 0.0002(18) 
C52 0.029(2) 0.074(3) 0.025(2) 0.003(2) -0.0050(16) -0.007(2) 
C53 0.052(3) 0.072(4) 0.064(3) 0.009(3) -0.006(3) -0.018(3) 
C54 0.035(2) 0.085(4) 0.044(3) -0.003(3) 0.004(2) 0.000(2) 
C55 0.051(4) 0.116(6) 0.045(4) 0.005(4) 0.007(3) 0.037(4) 
C56 0.052(7) 0.119(9) 0.059(7) 0.001(6) 0.010(6) 0.030(7) 
C57 0.055(5) 0.115(7) 0.046(5) 0.007(5) 0.001(4) 0.050(6) 
C55A 0.047(3) 0.106(5) 0.029(3) 0.001(3) 0.009(2) 0.043(3) 
C56A 0.052(4) 0.131(5) 0.070(4) 0.004(4) 0.000(3) 0.018(4) 
C57A 0.075(4) 0.122(6) 0.046(3) -0.011(4) -0.009(3) 0.068(4) 
C58 0.074(4) 0.090(4) 0.021(2) 0.012(2) 0.014(2) 0.034(3) 
C59 0.145(7) 0.075(4) 0.059(4) 0.025(3) 0.037(4) 0.013(4) 
C60 0.090(5) 0.196(9) 0.030(3) 0.032(4) 0.004(3) 0.026(5) 
N1 0.035(2) 0.061(3) 0.048(2) 0.002(2) 0.0036(17) 0.0034(18) 
N2 0.038(2) 0.051(2) 0.039(2) -0.0010(17) 0.0028(15) 0.0071(17) 
C61 0.041(2) 0.049(3) 0.034(2) 0.004(2) 0.0026(18) 0.009(2) 
C62 0.046(3) 0.074(3) 0.037(2) 0.015(2) 0.005(2) 0.018(3) 
C63 0.055(3) 0.053(3) 0.045(3) 0.014(2) 0.012(2) 0.018(2) 
C64 0.051(3) 0.077(4) 0.112(5) -0.015(4) 0.011(3) -0.011(3) 
C65 0.054(3) 0.158(7) 0.053(3) 0.019(4) -0.010(3) 0.034(4) 
C66 0.109(6) 0.064(4) 0.091(5) 0.026(4) 0.032(4) 0.017(4) 
C67 0.046(3) 0.073(4) 0.077(4) -0.026(3) -0.004(3) 0.007(3) 
N3 0.0308(19) 0.079(3) 0.048(2) 0.030(2) 0.0105(16) 0.0133(19) 
N4 0.032(2) 0.086(3) 0.067(3) 0.047(3) 0.0009(18) 0.007(2) 
C68 0.033(2) 0.067(3) 0.056(3) 0.023(3) 0.004(2) 0.012(2) 
C69 0.029(2) 0.063(3) 0.042(2) 0.016(2) 0.0005(18) 0.010(2) 
C70 0.027(2) 0.064(3) 0.041(2) 0.016(2) -0.0010(18) 0.003(2) 
C71 0.050(3) 0.156(7) 0.114(5) 0.089(5) 0.035(4) 0.021(4) 
C72 0.045(3) 0.078(4) 0.117(5) 0.048(4) 0.013(3) 0.023(3) 
C73 0.031(2) 0.105(5) 0.055(3) 0.030(3) 0.006(2) 0.000(3) 
C74 0.042(3) 0.202(9) 0.207(9) 0.178(8) 0.018(4) 0.023(5) 
 
_geom_special_details 
; 
 All esds (except the esd in the dihedral angle between two l.s. planes) 
 are estimated using the full covariance matrix.  The cell esds are taken 
 into account individually in the estimation of esds in distances, angles 
 and torsion angles; correlations between esds in cell parameters are only 
 used when they are defined by crystal symmetry.  An approximate (isotropic) 
 treatment of cell esds is used for estimating esds involving l.s. planes. 
; 
 
loop_ 
 _geom_bond_atom_site_label_1 
 _geom_bond_atom_site_label_2 
 _geom_bond_distance 
 _geom_bond_site_symmetry_2 
 _geom_bond_publ_flag 
Si1 O5 1.602(3) . ? 
Si1 O1 1.626(3) . ? 
Si1 O4 1.652(3) . ? 
Si1 C1 1.889(4) . ? 
Si2 O6 1.610(3) . ? 
Si2 O2 1.622(3) . ? 
Si2 O1 1.634(3) . ? 
Si2 C16 1.881(4) . ? 
Si3 O7 1.585(3) . ? 
Si3 O3 1.630(3) . ? 
Si3 O2 1.656(2) . ? 
Si3 C31 1.908(4) . ? 
Si4 O8 1.587(3) . ? 
Si4 O3 1.638(3) . ? 
Si4 O4 1.655(3) . ? 
Si4 C46 1.903(4) . ? 
C1 C6 1.418(5) . ? 
C1 C2 1.434(5) . ? 
C2 C3 1.384(6) . ? 
C2 C7 1.526(6) . ? 
C3 C4 1.388(7) . ? 
C4 C5 1.384(7) . ? 
C4 C10 1.521(7) . ? 
C5 C6 1.393(6) . ? 
C6 C13 1.536(5) . ? 
C7 C8 1.520(6) . ? 
C7 C9 1.545(6) . ? 
C10 C12A 1.271(19) . ? 
C10 C11A 1.445(15) . ? 
C10 C11 1.455(17) . ? 
C10 C12 1.651(18) . ? 
C13 C14 1.526(6) . ? 
C13 C15 1.526(6) . ? 
C16 C21 1.404(5) . ? 
C16 C17 1.424(5) . ? 
C17 C18 1.385(6) . ? 
C17 C22 1.50(2) . ? 
C17 C22A 1.58(2) . ? 
C18 C19 1.372(7) . ? 
C19 C20 1.387(6) . ? 
C19 C25 1.501(19) . ? 
C19 C25A 1.576(19) . ? 
C20 C21 1.408(5) . ? 
C21 C28 1.536(5) . ? 
C22 C24 1.51(2) . ? 
C22 C23 1.551(17) . ? 
C22A C23A 1.520(18) . ? 
C22A C24A 1.554(19) . ? 
C25 C26 1.43(2) . ? 
C25 C27 1.539(19) . ? 
C25A C26A 1.41(2) . ? 
C25A C27A 1.53(2) . ? 
C28 C29 1.514(6) . ? 
C28 C30 1.523(6) . ? 
C31 C36 1.416(5) . ? 
C31 C32 1.416(5) . ? 
C32 C33 1.388(6) . ? 
C32 C37 1.531(5) . ? 
C33 C34 1.386(6) . ? 
C34 C35 1.385(6) . ? 
C34 C40 1.511(6) . ? 
C35 C36 1.394(5) . ? 
C36 C43 1.525(5) . ? 
C37 C38 1.533(6) . ? 
C37 C39 1.534(6) . ? 
C40 C41 1.526(8) . ? 
C40 C42 1.533(8) . ? 
C43 C45 1.533(5) . ? 
C43 C44 1.541(6) . ? 
C46 C47 1.415(5) . ? 
C46 C51 1.417(5) . ? 
C47 C48 1.401(5) . ? 
C47 C55A 1.517(7) . ? 
C47 C55 1.648(15) . ? 
C48 C49 1.376(6) . ? 
C49 C50 1.392(6) . ? 
C49 C58 1.531(5) . ? 
C50 C51 1.399(5) . ? 
C51 C52 1.529(6) . ? 
C52 C54 1.516(7) . ? 
C52 C53 1.520(7) . ? 
C55 C57 1.699(16) . ? 
C55 C56 1.838(16) . ? 
C55A C57A 1.462(8) . ? 
C55A C56A 1.700(10) . ? 
C58 C60 1.468(8) . ? 
C58 C59 1.575(9) . ? 
N1 C61 1.333(6) . ? 
N1 C62 1.381(6) . ? 
N1 C64 1.455(7) . ? 
N2 C61 1.314(6) . ? 
N2 C63 1.398(6) . ? 
N2 C67 1.461(6) . ? 
C62 C63 1.332(7) . ? 
C62 C65 1.507(7) . ? 
C63 C66 1.486(7) . ? 
N3 C68 1.316(6) . ? 
N3 C69 1.400(5) . ? 
N3 C71 1.457(6) . ? 
N4 C68 1.325(6) . ? 
N4 C70 1.378(6) . ? 
N4 C74 1.463(7) . ? 
C69 C70 1.343(6) . ? 
C69 C72 1.483(6) . ? 
C70 C73 1.495(6) . ? 
 
loop_ 
 _geom_angle_atom_site_label_1 
 _geom_angle_atom_site_label_2 
 _geom_angle_atom_site_label_3 
 _geom_angle 
 _geom_angle_site_symmetry_1 
 _geom_angle_site_symmetry_3 
 _geom_angle_publ_flag 
O5 Si1 O1 109.95(15) . . ? 
O5 Si1 O4 111.35(13) . . ? 
O1 Si1 O4 106.90(14) . . ? 
O5 Si1 C1 109.25(16) . . ? 
O1 Si1 C1 111.04(15) . . ? 
O4 Si1 C1 108.33(16) . . ? 
O6 Si2 O2 110.85(14) . . ? 
O6 Si2 O1 108.58(14) . . ? 
O2 Si2 O1 107.17(13) . . ? 
O6 Si2 C16 112.29(15) . . ? 
O2 Si2 C16 111.14(16) . . ? 
O1 Si2 C16 106.57(16) . . ? 
O7 Si3 O3 111.14(14) . . ? 
O7 Si3 O2 112.29(14) . . ? 
O3 Si3 O2 104.77(13) . . ? 
O7 Si3 C31 112.38(15) . . ? 
O3 Si3 C31 110.97(15) . . ? 
O2 Si3 C31 104.88(14) . . ? 
O8 Si4 O3 110.99(14) . . ? 
O8 Si4 O4 109.70(14) . . ? 
O3 Si4 O4 107.32(14) . . ? 
O8 Si4 C46 113.76(16) . . ? 
O3 Si4 C46 102.83(15) . . ? 
O4 Si4 C46 111.89(16) . . ? 
Si1 O1 Si2 152.26(16) . . ? 
Si2 O2 Si3 131.11(16) . . ? 
Si3 O3 Si4 149.06(16) . . ? 
Si1 O4 Si4 130.21(16) . . ? 
C6 C1 C2 116.4(4) . . ? 
C6 C1 Si1 117.8(3) . . ? 
C2 C1 Si1 125.8(3) . . ? 
C3 C2 C1 119.8(4) . . ? 
C3 C2 C7 117.2(4) . . ? 
C1 C2 C7 123.0(4) . . ? 
C2 C3 C4 123.2(4) . . ? 
C5 C4 C3 117.5(4) . . ? 
C5 C4 C10 120.6(5) . . ? 
C3 C4 C10 121.8(5) . . ? 
C4 C5 C6 121.4(4) . . ? 
C5 C6 C1 121.6(4) . . ? 
C5 C6 C13 115.9(4) . . ? 
C1 C6 C13 122.5(4) . . ? 
C8 C7 C2 111.1(4) . . ? 
C8 C7 C9 109.8(4) . . ? 
C2 C7 C9 113.1(4) . . ? 
C12A C10 C11A 116.0(11) . . ? 
C12A C10 C11 130.9(12) . . ? 
C11A C10 C11 32.1(8) . . ? 
C12A C10 C4 115.6(10) . . ? 
C11A C10 C4 114.7(8) . . ? 
C11 C10 C4 113.2(8) . . ? 
C12A C10 C12 19.8(12) . . ? 
C11A C10 C12 106.5(9) . . ? 
C11 C10 C12 131.2(10) . . ? 
C4 C10 C12 108.6(8) . . ? 
C14 C13 C15 111.3(4) . . ? 
C14 C13 C6 110.9(4) . . ? 
C15 C13 C6 111.4(4) . . ? 
C21 C16 C17 117.3(3) . . ? 
C21 C16 Si2 119.0(3) . . ? 
C17 C16 Si2 123.3(3) . . ? 
C18 C17 C16 119.7(4) . . ? 
C18 C17 C22 115.8(8) . . ? 
C16 C17 C22 124.4(8) . . ? 
C18 C17 C22A 119.2(8) . . ? 
C16 C17 C22A 119.7(7) . . ? 
C22 C17 C22A 16.7(10) . . ? 
C19 C18 C17 123.0(4) . . ? 
C18 C19 C20 118.0(4) . . ? 
C18 C19 C25 118.1(10) . . ? 
C20 C19 C25 122.9(10) . . ? 
C18 C19 C25A 121.6(10) . . ? 
C20 C19 C25A 119.5(10) . . ? 
C25 C19 C25A 18.2(9) . . ? 
C19 C20 C21 121.0(4) . . ? 
C16 C21 C20 120.7(4) . . ? 
C16 C21 C28 123.4(3) . . ? 
C20 C21 C28 115.8(4) . . ? 
C17 C22 C24 104.9(12) . . ? 
C17 C22 C23 116.8(12) . . ? 
C24 C22 C23 110.1(13) . . ? 
C23A C22A C24A 111.0(13) . . ? 
C23A C22A C17 108.8(11) . . ? 
C24A C22A C17 113.1(13) . . ? 
C26 C25 C19 118.7(15) . . ? 
C26 C25 C27 114.7(14) . . ? 
C19 C25 C27 102.4(11) . . ? 
C26A C25A C27A 114.6(15) . . ? 
C26A C25A C19 106.1(12) . . ? 
C27A C25A C19 116.6(14) . . ? 
C29 C28 C30 109.8(4) . . ? 
C29 C28 C21 110.3(4) . . ? 
C30 C28 C21 112.7(4) . . ? 
C36 C31 C32 116.9(3) . . ? 
C36 C31 Si3 124.9(3) . . ? 
C32 C31 Si3 118.2(3) . . ? 
C33 C32 C31 120.8(3) . . ? 
C33 C32 C37 116.4(3) . . ? 
C31 C32 C37 122.7(3) . . ? 
C34 C33 C32 122.1(4) . . ? 
C35 C34 C33 117.3(4) . . ? 
C35 C34 C40 121.2(4) . . ? 
C33 C34 C40 121.5(4) . . ? 
C34 C35 C36 122.5(4) . . ? 
C35 C36 C31 120.1(3) . . ? 
C35 C36 C43 116.5(3) . . ? 
C31 C36 C43 123.4(3) . . ? 
C32 C37 C38 111.5(3) . . ? 
C32 C37 C39 110.3(4) . . ? 
C38 C37 C39 111.3(4) . . ? 
C34 C40 C41 111.7(4) . . ? 
C34 C40 C42 111.9(4) . . ? 
C41 C40 C42 110.5(4) . . ? 
C36 C43 C45 111.8(3) . . ? 
C36 C43 C44 111.8(3) . . ? 
C45 C43 C44 109.7(3) . . ? 
C47 C46 C51 117.6(3) . . ? 
C47 C46 Si4 121.5(3) . . ? 
C51 C46 Si4 119.4(3) . . ? 
C48 C47 C46 119.5(4) . . ? 
C48 C47 C55A 118.4(4) . . ? 
C46 C47 C55A 122.2(4) . . ? 
C48 C47 C55 117.4(11) . . ? 
C46 C47 C55 116.8(9) . . ? 
C55A C47 C55 26.4(9) . . ? 
C49 C48 C47 122.8(4) . . ? 
C48 C49 C50 117.5(4) . . ? 
C48 C49 C58 119.4(4) . . ? 
C50 C49 C58 123.1(4) . . ? 
C49 C50 C51 121.8(4) . . ? 
C50 C51 C46 120.1(4) . . ? 
C50 C51 C52 117.9(4) . . ? 
C46 C51 C52 121.8(3) . . ? 
C54 C52 C53 110.1(4) . . ? 
C54 C52 C51 115.2(4) . . ? 
C53 C52 C51 108.7(4) . . ? 
C47 C55 C57 93.3(13) . . ? 
C47 C55 C56 135.0(15) . . ? 
C57 C55 C56 126.6(18) . . ? 
C57A C55A C47 116.9(6) . . ? 
C57A C55A C56A 106.1(7) . . ? 
C47 C55A C56A 107.7(5) . . ? 
C60 C58 C49 115.2(5) . . ? 
C60 C58 C59 109.0(6) . . ? 
C49 C58 C59 109.5(4) . . ? 
C61 N1 C62 109.1(4) . . ? 
C61 N1 C64 124.4(5) . . ? 
C62 N1 C64 126.4(4) . . ? 
C61 N2 C63 109.9(4) . . ? 
C61 N2 C67 124.6(4) . . ? 
C63 N2 C67 125.4(4) . . ? 
N2 C61 N1 107.4(4) . . ? 
C63 C62 N1 107.7(4) . . ? 
C63 C62 C65 130.7(5) . . ? 
N1 C62 C65 121.6(5) . . ? 
C62 C63 N2 105.9(4) . . ? 
C62 C63 C66 131.3(5) . . ? 
N2 C63 C66 122.7(5) . . ? 
C68 N3 C69 109.1(4) . . ? 
C68 N3 C71 125.5(4) . . ? 
C69 N3 C71 125.4(4) . . ? 
C68 N4 C70 110.2(4) . . ? 
C68 N4 C74 124.4(4) . . ? 
C70 N4 C74 125.3(4) . . ? 
N3 C68 N4 107.7(4) . . ? 
C70 C69 N3 106.7(4) . . ? 
C70 C69 C72 130.7(4) . . ? 
N3 C69 C72 122.6(4) . . ? 
C69 C70 N4 106.3(4) . . ? 
C69 C70 C73 132.1(4) . . ? 
N4 C70 C73 121.6(4) . . ? 
 
_diffrn_measured_fraction_theta_max    0.999 
_diffrn_reflns_theta_full              67.50 
_diffrn_measured_fraction_theta_full   0.999 
_refine_diff_density_max    1.502 
_refine_diff_density_min   -0.842 
_refine_diff_density_rms    0.078 
loop_
  _platon_squeeze_void_nr
  _platon_squeeze_void_average_x
  _platon_squeeze_void_average_y
  _platon_squeeze_void_average_z
  _platon_squeeze_void_volume
  _platon_squeeze_void_count_electrons
  _platon_squeeze_void_content
   1  0.000  0.500  0.000        10         1 ' '
   2  0.000  1.000  0.500        10         1 ' '
   3  0.305  0.962  0.265        67        11 ' '
   4  0.305  0.538  0.765        67        11 ' '
   5  0.479  0.929  0.475         7         0 ' '
   6  0.479  0.571  0.975         7         0 ' '
   7  0.521  0.429  0.024         7         0 ' '
   8  0.521  0.071  0.524         7         0 ' '
   9  0.695  0.462  0.235        67        11 ' '
  10  0.695  0.038  0.735        67        11 ' '
_platon_squeeze_details
;
;
